# Supplementary material for: A novel income security intervention to address poverty in a primary care setting: a retrospective chart review
Source: PubMed Central journal article supplement — BMJ Open. 2017 Aug 17;7(8):e014270. doi: 10.1136/bmjopen-2016-014270 (PMC5724129; doi:10.1136/bmjopen-2016-014270), 2017-08-17
Supplement: bmjopen-2016-014270.draft_revisions.pdf [file bmjopen-2016-014270.draft_revisions.pdf]

# BMJ Open

## Income security health promotion to address poverty through primary care: A retrospective chart review

|                                 |                                                                                                                                                                                                                                                                                                                            |
|---------------------------------|----------------------------------------------------------------------------------------------------------------------------------------------------------------------------------------------------------------------------------------------------------------------------------------------------------------------------|
| Journal:                        | <i>BMJ Open</i>                                                                                                                                                                                                                                                                                                            |
| Manuscript ID                   | bmjopen-2016-014270                                                                                                                                                                                                                                                                                                        |
| Article Type:                   | Research                                                                                                                                                                                                                                                                                                                   |
| Date Submitted by the Author:   | 17-Oct-2016                                                                                                                                                                                                                                                                                                                |
| Complete List of Authors:       | Jones, Marcella; University of Toronto Faculty of Medicine<br>Bloch, Gary; University of Toronto Faculty of Medicine; St. Michael's Hospital, Department of Family and Community Medicine<br>Pinto, Andrew; University of Toronto Faculty of Medicine; St. Michael's Hospital, Department of Family and Community Medicine |
| <b>Primary Subject Heading</b>: | General practice / Family practice                                                                                                                                                                                                                                                                                         |
| Secondary Subject Heading:      | Health services research                                                                                                                                                                                                                                                                                                   |
| Keywords:                       | SOCIAL MEDICINE, PUBLIC HEALTH, PRIMARY CARE, PREVENTIVE MEDICINE                                                                                                                                                                                                                                                          |
|                                 |                                                                                                                                                                                                                                                                                                                            |

SCHOLARONE™  
Manuscripts

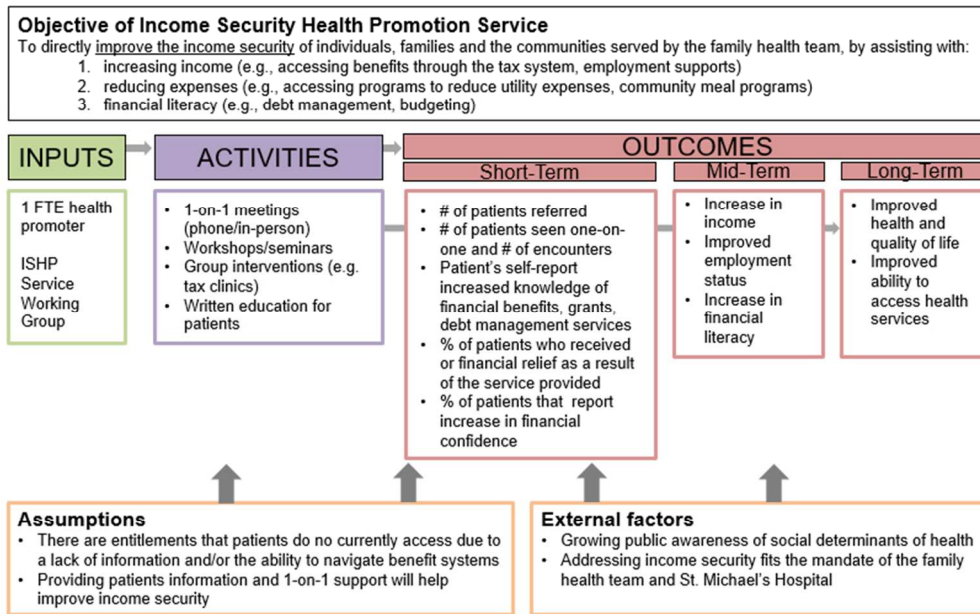

Abbreviated program logic model for the Income Security Health Promotion Service.

review only

1  
2  
3  
4  
5  
6  
7  
8  
9  
10  
11  
12  
13  
14  
15  
16  
17  
18  
19  
20  
21  
22  
23  
24  
25  
26  
27  
28  
29  
30  
31  
32  
33  
34  
35  
36  
37  
38  
39  
40  
41  
42  
43  
44  
45  
46  
47  
48  
49  
50  
51  
52  
53  
54  
55  
56  
57  
58  
59  
60

## Reporting checklist for “Income security health promotion to address poverty through primary care: A retrospective chart review”

### STROBE checklist for observational studies

|                           | Item No | Recommendation                                                                                                                                                                                                                                                                                                                                                                                                                                                         | Completed?                       |
|---------------------------|---------|------------------------------------------------------------------------------------------------------------------------------------------------------------------------------------------------------------------------------------------------------------------------------------------------------------------------------------------------------------------------------------------------------------------------------------------------------------------------|----------------------------------|
| <b>Title and abstract</b> | 1       | (a) Indicate the study’s design with a commonly used term in the title or the abstract                                                                                                                                                                                                                                                                                                                                                                                 | Yes                              |
|                           |         | (b) Provide in the abstract an informative and balanced summary of what was done and what was found                                                                                                                                                                                                                                                                                                                                                                    | Yes                              |
| <b>Introduction</b>       |         |                                                                                                                                                                                                                                                                                                                                                                                                                                                                        |                                  |
| Background/rationale      | 2       | Explain the scientific background and rationale for the investigation being reported                                                                                                                                                                                                                                                                                                                                                                                   | Yes                              |
| Objectives                | 3       | State specific objectives, including any prespecified hypotheses                                                                                                                                                                                                                                                                                                                                                                                                       | Yes                              |
| <b>Methods</b>            |         |                                                                                                                                                                                                                                                                                                                                                                                                                                                                        |                                  |
| Study design              | 4       | Present key elements of study design early in the paper                                                                                                                                                                                                                                                                                                                                                                                                                | Yes                              |
| Setting                   | 5       | Describe the setting, locations, and relevant dates, including periods of recruitment, exposure, follow-up, and data collection                                                                                                                                                                                                                                                                                                                                        | Yes                              |
| Participants              | 6       | (a) <i>Cohort study</i> —Give the eligibility criteria, and the sources and methods of selection of participants. Describe methods of follow-up<br><i>Case-control study</i> —Give the eligibility criteria, and the sources and methods of case ascertainment and control selection. Give the rationale for the choice of cases and controls<br><i>Cross-sectional study</i> —Give the eligibility criteria, and the sources and methods of selection of participants | Yes: for cross-sectional studies |
|                           |         | (b) <i>Cohort study</i> —For matched studies, give matching criteria and number of exposed and unexposed<br><i>Case-control study</i> —For matched studies, give matching criteria and the number of controls per case                                                                                                                                                                                                                                                 | N/A                              |
| Variables                 | 7       | Clearly define all outcomes, exposures, predictors, potential confounders, and effect modifiers. Give diagnostic criteria, if applicable                                                                                                                                                                                                                                                                                                                               | Yes                              |
| Data sources/measurement  | 8*      | For each variable of interest, give sources of data and details of methods of assessment (measurement). Describe comparability of assessment methods if there is more than one                                                                                                                                                                                                                                                                                         | Yes                              |

|                        |    |                                                                                                                                                                                                                                                                                                           |                                |
|------------------------|----|-----------------------------------------------------------------------------------------------------------------------------------------------------------------------------------------------------------------------------------------------------------------------------------------------------------|--------------------------------|
|                        |    | group                                                                                                                                                                                                                                                                                                     |                                |
| Bias                   | 9  | Describe any efforts to address potential sources of bias                                                                                                                                                                                                                                                 | Yes                            |
| Study size             | 10 | Explain how the study size was arrived at                                                                                                                                                                                                                                                                 | Yes                            |
| Quantitative variables | 11 | Explain how quantitative variables were handled in the analyses. If applicable, describe which groupings were chosen and why                                                                                                                                                                              | Yes                            |
| Statistical methods    | 12 | (a) Describe all statistical methods, including those used to control for confounding                                                                                                                                                                                                                     | Yes                            |
|                        |    | (b) Describe any methods used to examine subgroups and interactions                                                                                                                                                                                                                                       | N/A                            |
|                        |    | (c) Explain how missing data were addressed                                                                                                                                                                                                                                                               | Yes                            |
|                        |    | (d) <i>Cohort study</i> —If applicable, explain how loss to follow-up was addressed<br><i>Case-control study</i> —If applicable, explain how matching of cases and controls was addressed<br><i>Cross-sectional study</i> —If applicable, describe analytical methods taking account of sampling strategy | Yes: for cross-sectional study |
|                        |    | (e) Describe any sensitivity analyses                                                                                                                                                                                                                                                                     | N/A                            |

Continued on next page

| <b>Results</b>    |     |                                                                                                                                                                                                              | <b>Completed?</b>                                                           |
|-------------------|-----|--------------------------------------------------------------------------------------------------------------------------------------------------------------------------------------------------------------|-----------------------------------------------------------------------------|
| Participants      | 13* | (a) Report numbers of individuals at each stage of study—eg numbers potentially eligible, examined for eligibility, confirmed eligible, included in the study, completing follow-up, and analysed            | Yes                                                                         |
|                   |     | (b) Give reasons for non-participation at each stage                                                                                                                                                         | N/A                                                                         |
|                   |     | (c) Consider use of a flow diagram                                                                                                                                                                           | Have developed but did not include, as did not contribute to the manuscript |
| Descriptive data  | 14* | (a) Give characteristics of study participants (eg demographic, clinical, social) and information on exposures and potential confounders                                                                     | Yes                                                                         |
|                   |     | (b) Indicate number of participants with missing data for each variable of interest                                                                                                                          | Yes                                                                         |
|                   |     | (c) <i>Cohort study</i> —Summarise follow-up time (eg, average and total amount)                                                                                                                             | N/A                                                                         |
| Outcome data      | 15* | <i>Cohort study</i> —Report numbers of outcome events or summary measures over time                                                                                                                          | N/A                                                                         |
|                   |     | <i>Case-control study</i> —Report numbers in each exposure category, or summary measures of exposure                                                                                                         | N/A                                                                         |
|                   |     | <i>Cross-sectional study</i> —Report numbers of outcome events or summary measures                                                                                                                           | Yes                                                                         |
| Main results      | 16  | (a) Give unadjusted estimates and, if applicable, confounder-adjusted estimates and their precision (eg, 95% confidence interval). Make clear which confounders were adjusted for and why they were included | Yes                                                                         |
|                   |     | (b) Report category boundaries when continuous variables were categorized                                                                                                                                    | Yes                                                                         |
|                   |     | (c) If relevant, consider translating estimates of relative risk into absolute risk for a meaningful time period                                                                                             | N/A                                                                         |
| Other analyses    | 17  | Report other analyses done—eg analyses of subgroups and interactions, and sensitivity analyses                                                                                                               | Yes: Qualitative analyses                                                   |
| <b>Discussion</b> |     |                                                                                                                                                                                                              |                                                                             |
| Key results       | 18  | Summarise key results with reference to study objectives                                                                                                                                                     | Yes                                                                         |
| Limitations       | 19  | Discuss limitations of the study, taking into account sources of potential bias or imprecision. Discuss both direction and magnitude of any potential bias                                                   | Yes                                                                         |

|    |                          |    |                                                     |     |
|----|--------------------------|----|-----------------------------------------------------|-----|
| 1  |                          |    |                                                     |     |
| 2  | Interpretation           | 20 | Give a cautious overall interpretation of results   | Yes |
| 3  |                          |    | considering objectives, limitations, multiplicity   |     |
| 4  |                          |    | of analyses, results from similar studies, and      |     |
| 5  |                          |    | other relevant evidence                             |     |
| 6  |                          |    |                                                     |     |
| 7  | Generalisability         | 21 | Discuss the generalisability (external validity) of |     |
| 8  |                          |    | the study results                                   | Yes |
| 9  |                          |    |                                                     |     |
| 10 | <b>Other information</b> |    |                                                     |     |
| 11 | Funding                  | 22 | Give the source of funding and the role of the      | Yes |
| 12 |                          |    | funders for the present study and, if applicable,   |     |
| 13 |                          |    | for the original study on which the present article |     |
| 14 |                          |    | is based                                            |     |
| 15 |                          |    |                                                     |     |
| 16 |                          |    |                                                     |     |
| 17 |                          |    |                                                     |     |
| 18 |                          |    |                                                     |     |
| 19 |                          |    |                                                     |     |
| 20 |                          |    |                                                     |     |
| 21 |                          |    |                                                     |     |
| 22 |                          |    |                                                     |     |
| 23 |                          |    |                                                     |     |
| 24 |                          |    |                                                     |     |
| 25 |                          |    |                                                     |     |
| 26 |                          |    |                                                     |     |
| 27 |                          |    |                                                     |     |
| 28 |                          |    |                                                     |     |
| 29 |                          |    |                                                     |     |
| 30 |                          |    |                                                     |     |
| 31 |                          |    |                                                     |     |
| 32 |                          |    |                                                     |     |
| 33 |                          |    |                                                     |     |
| 34 |                          |    |                                                     |     |
| 35 |                          |    |                                                     |     |
| 36 |                          |    |                                                     |     |
| 37 |                          |    |                                                     |     |
| 38 |                          |    |                                                     |     |
| 39 |                          |    |                                                     |     |
| 40 |                          |    |                                                     |     |
| 41 |                          |    |                                                     |     |
| 42 |                          |    |                                                     |     |
| 43 |                          |    |                                                     |     |
| 44 |                          |    |                                                     |     |
| 45 |                          |    |                                                     |     |
| 46 |                          |    |                                                     |     |
| 47 |                          |    |                                                     |     |
| 48 |                          |    |                                                     |     |
| 49 |                          |    |                                                     |     |
| 50 |                          |    |                                                     |     |
| 51 |                          |    |                                                     |     |
| 52 |                          |    |                                                     |     |
| 53 |                          |    |                                                     |     |
| 54 |                          |    |                                                     |     |
| 55 |                          |    |                                                     |     |
| 56 |                          |    |                                                     |     |
| 57 |                          |    |                                                     |     |
| 58 |                          |    |                                                     |     |
| 59 |                          |    |                                                     |     |
| 60 |                          |    |                                                     |     |

# BMJ Open

## A novel income security intervention to address poverty in a primary care setting: A retrospective chart review

|                                 |                                                                                                                                                                                                                                                                                                                                                                                                                      |
|---------------------------------|----------------------------------------------------------------------------------------------------------------------------------------------------------------------------------------------------------------------------------------------------------------------------------------------------------------------------------------------------------------------------------------------------------------------|
| Journal:                        | <i>BMJ Open</i>                                                                                                                                                                                                                                                                                                                                                                                                      |
| Manuscript ID                   | bmjopen-2016-014270.R1                                                                                                                                                                                                                                                                                                                                                                                               |
| Article Type:                   | Research                                                                                                                                                                                                                                                                                                                                                                                                             |
| Date Submitted by the Author:   | 05-Jun-2017                                                                                                                                                                                                                                                                                                                                                                                                          |
| Complete List of Authors:       | Jones, Marcella; University of Toronto Faculty of Medicine<br>Bloch, Gary; University of Toronto Faculty of Medicine, Department of Family and Community Medicine; St. Michael's Hospital, Department of Family and Community Medicine<br>Pinto, Andrew; University of Toronto Faculty of Medicine, Department of Family and Community Medicine; St. Michael's Hospital, Department of Family and Community Medicine |
| <b>Primary Subject Heading</b>: | General practice / Family practice                                                                                                                                                                                                                                                                                                                                                                                   |
| Secondary Subject Heading:      | Health services research                                                                                                                                                                                                                                                                                                                                                                                             |
| Keywords:                       | SOCIAL MEDICINE, PUBLIC HEALTH, PRIMARY CARE, PREVENTIVE MEDICINE                                                                                                                                                                                                                                                                                                                                                    |
|                                 |                                                                                                                                                                                                                                                                                                                                                                                                                      |

SCHOLARONE™  
Manuscripts

1  
2  
3 **A novel income security intervention to address poverty in a primary care setting: A**  
4  
5 **retrospective chart review**  
6  
7  
8  
9

10 Marcella K. Jones MPH<sup>1</sup>, Gary Bloch MD<sup>2,3</sup>, Andrew D. Pinto MD MSc<sup>2,3,4,5\*</sup>  
11

- 12 1. Faculty of Medicine, University of Toronto
- 13 2. Department of Family and Community Medicine, St. Michael's Hospital
- 14 3. Department of Family and Community Medicine, Faculty of Medicine, University of  
15 Toronto  
16
- 17 4. Centre for Urban Health Solutions, Li Ka Shing Knowledge Institute, St. Michael's  
18 Hospital  
19
- 20 5. Dalla Lana School of Public Health, University of Toronto  
21  
22  
23  
24  
25  
26  
27  
28  
29  
30  
31

32 **\* Corresponding author:**

33  
34 *Andrew D. Pinto*

35  
36 *St. Michael's Hospital*

37  
38 *410 Sherbourne Street, 4<sup>th</sup> Floor*

39  
40  
41 *Toronto, Ontario*

42  
43 *Canada*

44  
45 *M4X 1K2*

46  
47  
48 *P: 416-867-3728*

49  
50  
51 *F: 416-867-3726*

52  
53 [andrew.pinto@utoronto.ca](mailto:andrew.pinto@utoronto.ca)  
54  
55  
56  
57  
58  
59  
60



**Abstract**

Objective: To examine the development and implementation of a novel income security intervention in primary care.

Design: A retrospective, descriptive chart review of all patients referred to the Income Security Health Promotion service during the first year of the service (December 2013 to December 2014).

Setting: A multi-site interdisciplinary primary care organization in inner city Toronto, Canada, serving over 40,000 patients.

Participants: The study population included one hundred and eighty-one patients (53% female, mean age 48 years old) who were referred to the Income Security Health Promotion service and engaged in care.

Intervention: The Income Security Health Promotion service consists of a trained health promoter who provides a mixture of expert advice and case management to patients to improve income security. An advisory group, made up of physicians, social workers, a community engagement specialist and a clinical manager, supports the service.

Outcome measures: Socio-demographic information, health status, referral information and encounter details were collected from patient charts.

*Income security health promotion to address poverty through primary care*

1  
2  
3 Results: Encounters focused on helping patients with increasing their income (77.4%), reducing  
4 their expenses (58.6%) and improving their financial literacy (26.5%). The health promoter  
5 provided an array of services to patients, including assistance with taxes, connecting to  
6 community services, budgeting and accessing free services. The service could be improved with  
7 more specific goal setting, better links to other members of the health care team and  
8 implementing routine follow-up with each patient after discharge.  
9  
10  
11  
12  
13  
14  
15  
16  
17  
18  
19

20 Conclusions: Income Security Health Promotion is a novel service within primary care to assist  
21 vulnerable patients with a key social determinant of health. This study is a preliminary look at  
22 understanding the functioning of the service. Future research will examine the impact of the  
23 Income Security Health Promotion service on income security, financial literacy, engagement  
24 with health services and health outcomes.  
25  
26  
27  
28  
29  
30  
31  
32  
33  
34  
35  
36  
37  
38  
39  
40  
41  
42  
43  
44  
45  
46  
47  
48  
49  
50  
51  
52  
53  
54  
55  
56  
57  
58  
59  
60

## Article summary

Strengths and limitations of this study:

- This is the first study of a novel intervention to address poverty directly within a primary care team, which entails having a health promoter focused full-time on improving income security.
- This study reports on key lessons learned from implementation, which can inform other interventions focused on social determinants of health.
- The generalizability of our findings is limited by the retrospective and descriptive nature of the study and that this was a single-centre study.
- This study does not report on the impact of the intervention on specific income or health outcomes, which will be examined by prospective, randomized studies.

## **Introduction**

The social determinants of health are contextual factors and social processes that impact the health of individuals and communities and are shaped by the distribution of money, power and resources[1]. One of the most important determinants of health is income[2,3]. Health outcomes follow a clear income gradient: those with lower incomes have shorter lives and experience a greater burden of disease and disability than individuals with higher incomes. This includes but is not limited to higher rates of cardiovascular disease, obesity, diabetes, stroke and some cancers among people who are living on low incomes[4–8]. Living in poverty is also associated with an increased probability of requiring extensive and costly health care services later in life[9,10].

Income security is defined as a person's level of income (absolute and relative to needs), level of assurance a person will receive this income and expectation of income adequacy now and in the future[11,12]. Interventions to improve income security are typically discussed as policy solutions, including reducing unemployment, raising minimum wage levels and raising social assistance rates[13]. However, health providers have become increasingly engaged in discussions about reducing poverty to improve the health of individuals and communities. In Canada, the Ontario Medical Association published a series of articles focused on how physicians can and should address poverty as a health issue[14–16]. The Canadian Medical Association has specifically called for the creation of interventions to address poverty within clinical spaces[17]. The College of Family Physicians of Canada recently issued a clinical practice guideline for addressing social determinants of health, including through work at the individual level on income security[18].

*Income security health promotion to address poverty through primary care*

1  
2  
3 We know that living on a low income is bad for health, but will social interventions to increase  
4 income in clinical settings be successful and will they result in better health? Few studies have  
5 examined this question directly[19]. Exceptions include evaluations of services that are based in  
6 general medical practices in the United Kingdom that help people living on low income access  
7 government benefits[20,21]. These services typically involve staff from the Citizen Advice  
8 Bureau charity working part-time in a general practice and helping patients access government  
9 income benefits. A systematic review of such services found a positive impact on income  
10 security for patients through improved access to both lump sum and recurring benefits, estimated  
11 at £1026 (US\$1867, €1498) in the first year after the intervention, based on the 28 studies that  
12 reported financial data [22]. A single randomized controlled trial of these services found that  
13 accessing a Citizen Advice Bureau worker in a general practice led to most participants having  
14 an increase in benefits, but no significant health differences at 6 months[23]. A recent study of a  
15 small, unconditional income supplement provided to low income pregnant women in Manitoba,  
16 Canada, found a reduction in preterm births and low birth weight babies in the intervention  
17 group[24]. Researchers have hypothesized that improved income security reduces material  
18 deprivation and chronic stress, which subsequently improves the physical health of individuals  
19 and the social capital of communities [25,26].  
20  
21  
22  
23  
24  
25  
26  
27  
28  
29  
30  
31  
32  
33  
34  
35  
36  
37  
38  
39  
40  
41  
42  
43  
44  
45

46 In Canada, financial advice programs are occasionally offered by community or social service  
47 agencies, or rarely through collaboration between a community organization and a health  
48 organization[27]. To our knowledge, there are no clinical services or programs in a primary care  
49 setting in Canada that specifically address income as a determinant of health. Primary care  
50 organizations are ideal spaces in which to intervene on social determinants of health and improve  
51  
52  
53  
54  
55  
56  
57  
58  
59  
60

1  
2  
3 health equity[28,29]. Primary care is well situated to reach vulnerable patients and to deliver  
4  
5 innovative services to improve income[30]. Primary care providers may be the first point of  
6  
7 contact for people in financial difficulty, usually follow people longitudinally, are increasingly  
8  
9 accessible and often have connections to social services[31]. Studies to date have focused on  
10  
11 understanding barriers to accessing health care for those living in poverty[32], barriers to  
12  
13 addressing income security in clinical settings, or improving access to primary care for  
14  
15 marginalized populations as a means for reducing inequities in health[33], but few look at  
16  
17 specific programs or services within primary care that target social determinants of health as  
18  
19 potential health equity interventions[30].  
20  
21  
22  
23  
24  
25  
26

27 The Income Security Health Promotion service is a novel intervention to help patients achieve  
28  
29 greater income stability through the provision of financial advice and support. Evaluation of this  
30  
31 service is a priority as there is a need to study primary care interventions that seek to improve  
32  
33 health equity through action on social determinants of health[34–36]. In this initial assessment,  
34  
35 we conducted a retrospective descriptive chart review of all the patients seen during the first year  
36  
37 of the service in order to understand and refine the intervention and also to inform the design of a  
38  
39 randomized controlled trial. We report on the patient population, the financial advice and support  
40  
41 provided and our lessons learned from the first year of the service.  
42  
43  
44  
45  
46  
47  
48  
49  
50

## 51 **Methods**

### 52 ***Setting***

53  
54  
55  
56  
57  
58  
59  
60

*Income security health promotion to address poverty through primary care*

1  
2  
3 Ontario's Family Health Teams are interdisciplinary centres for the delivery of primary care and  
4  
5 employ physicians, nurse practitioners, nurses, dietitians, pharmacists, social workers and other  
6  
7 health professionals[37]. The St. Michael's Hospital Academic Family Health Team (the FHT)  
8  
9 serves a panel of over 40,000 patients at six clinics located in downtown Toronto. Over 50% of  
10  
11 patients are estimated to reside in areas with average incomes in the lowest two income  
12  
13 quintiles[38]. Advancing systems of care for disadvantaged populations is one of the three  
14  
15 strategic priorities of St. Michael's Hospital[39]. Physicians within the FHT have engaged in  
16  
17 advocacy to address poverty as a health concern, including through helping to establish Health  
18  
19 Providers Against Poverty in 2005[40] and the Ontario College of Family Physicians' Poverty  
20  
21 and Health Committee in 2010[41]. Building on this work, physicians in the St. Michael's  
22  
23 Hospital FHT recognized a need for interventions that target poverty in the clinical setting and  
24  
25 developed the Income Security Health Promotion service. Provincial funding was obtained from  
26  
27 the Ontario Ministry of Health and Long-Term Care for a full-time health promoter to focus on  
28  
29 income security and the service launched in December 2013. To our knowledge, it is the first  
30  
31 program of its kind in Canada.  
32  
33  
34  
35  
36  
37  
38  
39  
40

***Intervention***

41  
42 The income security health promoter (ISHP) provides advocacy and case management services  
43  
44 that are similar to those of a social worker, but with a specialized knowledge of income support  
45  
46 systems and financial issues and a practice dedicated specifically to helping patients with income  
47  
48 security. The ISHP is supported by a manager, staff physicians, social workers and a community  
49  
50 engagement specialist, who meet biweekly as an advisory group. Patients are referred to the  
51  
52 Income Security Health Promotion service by any member of the primary care team, at their  
53  
54  
55  
56  
57  
58  
59  
60

1  
2  
3 discretion. Any individual who could benefit from financial advice and services was eligible for  
4  
5 the service. There was no minimum income threshold required for referral, but health  
6  
7 professionals are encouraged to use a simple, validated screening question to identify patients  
8  
9 living at low income: “*Do you have trouble making ends meet at the end of the month?*” [42,43].  
10  
11 The goal of the Income Security Health Promotion service is to help patients achieve greater  
12  
13 income stability through the provision of financial advice and services within three domains: 1)  
14  
15 increasing income (e.g., accessing benefits through the tax system, employment supports), 2)  
16  
17 reducing expenses (e.g., accessing rent-g geared-to-income housing) and 3) financial literacy (e.g.,  
18  
19 debt management, budgeting). A program logic model was developed to provide a common  
20  
21 framework for understanding how the service will function and what we propose it will  
22  
23 accomplish (**Figure 1**). The logic model illustrates the relationships between the service’s inputs,  
24  
25 activities and outcome measures and is a tool that guides our overall approach to evaluating the  
26  
27 implementation of the service.  
28  
29  
30  
31  
32  
33  
34  
35

### ***Chart Review***

36  
37 We conducted a retrospective chart review of the medical records of patients who had engaged  
38  
39 with the Income Security Health Promotion service during its first year. Ethics approval was  
40  
41 obtained from the St. Michael’s Hospital Research Ethics Board. Patients were included in the  
42  
43 study if they were referred to the ISHP and their first encounter was between December 1, 2013  
44  
45 and November 30, 2014. Patients were excluded if they were referred to the ISHP but not seen, if  
46  
47 their first encounter with the ISHP was outside the study period, or if they had specifically  
48  
49 requested that their chart be made private. A search of the electronic medical record (EMR) at  
50  
51 the FHT was conducted in March 2015 to identify all patients with any note on their chart to or  
52  
53  
54  
55  
56  
57  
58  
59  
60



*Income security health promotion to address poverty through primary care*

1  
2  
3 from the health promoter and then each chart was manually reviewed to identify patients that met  
4  
5 the study inclusion criteria.  
6  
7

8  
9  
10 Data were manually extracted from the EMR, including from the Income Security Health  
11  
12 Promotion referral form and the ISHP's progress notes. The cumulative patient profile was used  
13  
14 to collect sociodemographic and general health information: year of birth, gender, 3-digit postal  
15  
16 code, patient status at the FHT, homelessness, number of problems and number of medications.  
17  
18 A patient was considered homeless if they had no fixed address, or if it was indicated that they  
19  
20 were living on the street, in a shelter, or with friends when they were being seen by the ISHP. As  
21  
22 a crude measure of health status, a count of the number of medical problems and the number of  
23  
24 medications was performed. In addition to prescription medications, the number of medications  
25  
26 also includes items such as vitamins, massage therapy prescriptions and topical creams.  
27  
28  
29  
30  
31  
32  
33

34 The Income Security Health Promotion referral form was completed by the referring individual  
35  
36 and provided the reason for referral, urgency of referral (determined by the referring individual)  
37  
38 and current source of income. The referral form could also be used to indicate if there were any  
39  
40 barriers to accessing the service.  
41  
42  
43  
44

45  
46 Most of the ISHP's notes were entered into the EMR using a standardized encounter form that  
47  
48 was completed during patient interactions (in the office or over the phone) and includes  
49  
50 information about type and length of appointment, appointment, current income and number of  
51  
52 people supported, main problems addressed, action plan and plan for follow-up. This form was  
53  
54 not used for brief communications such as short follow-up phone calls or if a patient stopped by  
55  
56  
57  
58  
59  
60

1  
2  
3 to pick up an application form. We analyzed all encounters, both those that used this  
4  
5 standardized form and those that did not. All data were manually extracted by one author (MKJ)  
6  
7 and entered into a chart extraction form.  
8  
9

10  
11  
12 In addition, we extracted sociodemographic, health and referral information from the charts of  
13  
14 individuals who were referred to the service but not seen by the ISHP, to compare this excluded  
15  
16 group to our study population.  
17  
18  
19

### 20 21 22 ***Analysis***

23  
24 Descriptive statistics were calculated for all measures. Bivariate analyses using t-tests or  
25  
26 Pearson's  $\chi^2$  statistic, as appropriate, were conducted to compare our study population with the  
27  
28 participants who were referred to the ISHP but not seen. Quantitative analyses were performed  
29  
30 using SAS version 9.3. Free text notes extracted from the charts were reviewed by two authors  
31  
32 (MKJ, ADP). These notes were analyzed to identify the key categories of problems that were  
33  
34 addressed and to identify the main interventions. We also developed illustrative examples of  
35  
36 common cases seen by the ISHP and confirmed their representativeness with the ISHP and the  
37  
38 advisory group.  
39  
40  
41  
42  
43  
44

### 45 46 **Results**

47  
48 Three hundred and twenty-six charts were identified by the initial EMR search as having been  
49  
50 referred to the Income Security Health Promotion service since its inception. Of these, 181 met  
51  
52 inclusion criteria for the study. A total of 145 patients were excluded from the study population:  
53  
54 69 patients who were referred to the service but were not seen (e.g., did not schedule an  
55  
56  
57  
58  
59  
60

*Income security health promotion to address poverty through primary care*

1  
2  
3 appointment or were no-shows) and 76 patients whose first interaction with the service was  
4  
5  
6 outside of the study window.  
7  
8  
9

10 Patient characteristics and referral information are outlined (**Table 1**). All patients were adults,  
11  
12 the mean age was 48 years old and 53% were female. Approximately 4% of patients were  
13  
14 transgender. The mean number of health problems and medications in the population was 4.7 and  
15  
16 6.4, respectively. A referral form was completed for 66% of the patients (n=119) and about a  
17  
18 quarter of referrals were deemed urgent by the referring individual. Examples of urgent referrals  
19  
20 made were for individuals who had recently lost their job or income source, or for individuals  
21  
22 who were facing eviction or being pursued by creditors. About 20% of referral forms indicated  
23  
24 perceived barriers to accessing the service. These barriers included mobility difficulties, mental  
25  
26 illness and geographic barriers. There were no significant differences in the demographics or  
27  
28 health status between our study population and the individuals who were referred to but not seen  
29  
30 by the ISHP. Compared to the study population, individuals who were referred to the service but  
31  
32 not seen were more likely to have a referral form completed by the referring provider ( $p<0.01$ )  
33  
34 and be referred for help with financial literacy ( $p=0.03$ ).  
35  
36  
37  
38  
39  
40  
41  
42

43 The ISHP interacted with each patient an average of 2.3 times. Most patients interacted with the  
44  
45 ISHP once or twice, with fewer patients (16%) requiring four or more appointments to meet their  
46  
47 needs. The mean length of time for an encounter was just over an hour (66 minutes) (**Table 2**).  
48  
49

50 Monthly income information was available for 164 patients, with a mean income of \$1,302 CAD  
51  
52 per household per month, or \$907 CAD per person per month. In terms of the problems  
53  
54 addressed, 77% of encounters dealt with increasing income, most often applying to basic welfare  
55  
56  
57  
58  
59  
60

*Income security health promotion to address poverty through primary care*

1  
2  
3 (27%), the Ontario Disability Support Program (36%), or helping a patient with filing taxes  
4  
5 (28%). Reducing expenses was addressed in 59% of all encounters, with housing (27%), food  
6  
7 (15%) and medications (12%) being the most common areas that required help. In 26% of all  
8  
9 encounters, the ISHP addressed financial literacy, which primarily involved discussing budgeting  
10  
11 and explaining eligibility for benefits.  
12  
13

14  
15  
16  
17 Most (79%) encounters resulted in the requirement of an action from both the ISHP (79%) and  
18  
19 the patient (66%). Approximately 19% were discharged from the service after the first visit and  
20  
21 over half (58%) had follow-up planned after the first visit (**Table 3**). An example of a typical  
22  
23 case was a man in his thirties with chronic mental illness, who was intermittently receiving basic  
24  
25 welfare, had not filed his taxes for several years and had significant debt. The ISHP met with this  
26  
27 patient three times and provided information on free tax-filing services and local food banks. She  
28  
29 also obtained information from the Canada Revenue Agency to assist with submitting tax  
30  
31 documents, provided financial education and counseling on managing his tax refund and referred  
32  
33 the patient to legal assistance. Another example of a typical case was a homeless woman in her  
34  
35 sixties, who had no income at all when referred and was paying for her medications out-of-  
36  
37 pocket. The ISHP met with her six times and assisted with a successful application to Old Age  
38  
39 Security and advocated to the pharmacy for a reduction in medication-related costs. A final  
40  
41 example was a woman in her forties who had been dependent on her partner who suddenly  
42  
43 passed away. The ISHP met with her six times and assisted with an application for basic welfare,  
44  
45 assisted with filing taxes, averted an eviction and helped her access emergency funding for food  
46  
47 and clothing. An example of a poor fit for the service included a woman in her forties who had  
48  
49 severe mental illness, who was referred for assistance with completing a disability application.  
50  
51  
52  
53  
54  
55  
56  
57  
58  
59  
60

*Income security health promotion to address poverty through primary care*

1  
2  
3 The ISHP was able to meet with her once and was able to successfully advocated for an extended  
4  
5 deadline to submit documents. Her symptoms were so severe that she was unable to attend  
6  
7 appointments or complete even basic documents, resulting in no change in her circumstances. In  
8  
9 summary, the ISHP addressed a diversity of financial issues and provided a broad scope of  
10  
11 financial advice, financial literacy and interventions to patients.  
12  
13  
14  
15  
16  
17  
18  
19

**Discussion**

20  
21  
22 The Income Security Health Promotion service within the St. Michael's Hospital FHT is a novel  
23  
24 primary care intervention to address income as a key social determinant of health. It was  
25  
26 developed in response to the call for interventions to address poverty in clinical settings and  
27  
28 reduce health inequities in Canada[16,44]. Most patients seen were living with multiple health  
29  
30 problems and were taking many medications. A large proportion of individuals were receiving  
31  
32 social assistance prior to referral, yet still needed help with increasing their income. A number of  
33  
34 patients seen were completely destitute (e.g. living in a homeless shelter, zero income) and  
35  
36 required assistance with obtaining basic necessities. The ISHP's activities were diverse and  
37  
38 included helping individuals access government benefits, file taxes, access affordable housing,  
39  
40 develop financial literacy, learn budgeting, plan for retirement and engage in debt restructuring.  
41  
42 The ISHP often consulted external organizations, gathered additional information, advocated for  
43  
44 the patient to another organization, or helped with form completion for complex benefit  
45  
46 programs. Many patients required help because they faced obstacles to navigating complex  
47  
48 health, social and financial systems. Some were newcomers to Canada and faced language  
49  
50  
51  
52  
53  
54  
55  
56  
57  
58  
59  
60

1  
2  
3 barriers, while others were struggling with mental illness that made it difficult to complete forms  
4  
5 and follow-up on applications.  
6  
7  
8  
9

10 A strength of this study was that it included everyone seen by the Income Security Health  
11 Promotion service during its first year in operation. Our descriptive analysis should be an  
12 accurate representation of the service on the reported measures. Further, we were able to  
13 compare our study population to those who were referred to the service but not seen by the ISHP  
14 (e.g., due to missed appointments, or not responding to the ISHP's messages to set up an  
15 appointment). The populations were not significantly different in terms of their  
16 sociodemographic factors or health status. The excluded population was more likely to be  
17 referred for help with health literacy, however and this may indicate general difficulties with  
18 communication that would have been a contributing factor as to why they were not seen by the  
19 service.  
20  
21  
22  
23  
24  
25  
26  
27  
28  
29  
30  
31  
32  
33  
34  
35

36 This study also had limitations. As a retrospective chart review, we were restricted to data  
37 contained within patient charts. Patient characteristics that are relevant to understanding the  
38 functioning of the program were not always available, for example specific disease conditions  
39 including presence of mental illness or addictions, family status and employment status.  
40  
41  
42  
43  
44

45 Additionally, the ISHP's encounter form was designed to capture the main themes rather than the  
46 intricacies of appointments. We are unable to estimate the reach of this service in meeting the  
47 needs of FHT patients who are living on very low incomes, as we do not have data on income  
48 from all patients at this time. We were able to capture information on all patients referred and  
49 seen during the study period and we detected no significant differences between these groups.  
50  
51  
52  
53  
54  
55  
56  
57  
58  
59  
60

*Income security health promotion to address poverty through primary care*

1  
2  
3 However, the small numbers in each category may mean that we lacked the power to detect  
4  
5 small but important differences between these groups. Finally, our study is a preliminary  
6  
7 descriptive look at the program and provides a first explanatory insight into the intervention. It  
8  
9 does not report on outcomes that measure impact, so it is unknown whether the Income Security  
10  
11 Health Promotion service is effective at increasing income or improving health in a primary care  
12  
13 setting.  
14  
15  
16  
17  
18  
19

20 This Income Security Health Promotion service operates in a similar manner to welfare rights  
21  
22 advice services that are embedded in general practices in the United Kingdom[22,45,46]. While  
23  
24 the ISHP saw a relatively small proportion of all the patients in the FHT living on very low  
25  
26 incomes, the number of patients referred and ultimately seen is comparable to these programs.  
27  
28 Both programs are similar in their rationales, that income security is an important social  
29  
30 determinant of health, patients are usually connected to the service through their health provider  
31  
32 and a key goal is to increase access to government benefits[47–49]. Key differences are that the  
33  
34 ISHP is integrated into the primary care team and has access to the EMR, rather than being an  
35  
36 employee of an external organization. We believe embedding the ISHP into the health team is an  
37  
38 important aspect of this service that may improve access, as individuals are already connected  
39  
40 with the FHT organization and may experience reduced stigma for accessing financial advice in  
41  
42 this setting, as opposed to accessing financial advice from community-based poverty and income  
43  
44 support organizations. Further, the ISHP addresses multiple domains of income security, rather  
45  
46 than only government benefits. The program also fits within a framework that was developed by  
47  
48 Browne et al[50] to identify strategies that organizations can utilize to close the health equity  
49  
50 gap. Their framework identifies three distinct levels for which to act: organizational, clinical  
51  
52  
53  
54  
55  
56  
57  
58  
59  
60

*Income security health promotion to address poverty through primary care*

1  
2  
3 programming and provider-patient interactions. Many aspects of the Income Security Health  
4  
5 Promotion service are aligned with their identified strategies, such as “enhancing access to social  
6  
7 determinants of health” and “revising use of time”. This service may therefore contribute to  
8  
9 reducing health inequities in the communities that are served by the FHT.  
10  
11

12  
13  
14 A significant portion of the ISHP’s activities involved educating patients. Group education  
15  
16 sessions that could reach many patients simultaneously were not conducted during the first year  
17  
18 of this program, but could be a key addition to the service. Many patients required help with  
19  
20 filing taxes. Estimates from the Ontario Ministry of Community and Social Services indicate that  
21  
22 social assistance recipients can increase their annual income by 10-50% through tax filing  
23  
24 alone[51]. Directing patients to tax clinics, either delivered by the FHT or by community  
25  
26 agencies, would likely improve the efficiency of the program. Some of the ISHP’s work involved  
27  
28 connecting patients with easily accessible supports. Other health providers in the FHT could be  
29  
30 trained by the ISHP to deliver some basic education, in order to reduce demand on the ISHP.  
31  
32  
33  
34  
35  
36  
37  
38

39 Based on this study, a number of changes to the implementation of the service are proposed.  
40  
41 First, given that a large number of patients were difficult to reach, we recommend asking patients  
42  
43 when referred about secondary phone numbers, email addresses and contact information of  
44  
45 friends and support workers. We also recommend having the ISHP be co-located directly with  
46  
47 clinical services so that particularly hard to reach patients can be introduced to the ISHP at  
48  
49 clinical appointments. Second, a few referrals were inappropriate or better served by another  
50  
51 service (such as clinical pharmacy or social work). We recommend implementing an initial  
52  
53 assessment, perhaps conducted by clerical staff, to ensure the appropriateness of the referral, to  
54  
55  
56  
57  
58  
59  
60



*Income security health promotion to address poverty through primary care*

1  
2  
3 identify patient goals and to identify documents required (e.g. previous tax returns). This  
4  
5 assessment could also include a triage protocol to identify urgent referrals. Third, in order to  
6  
7 ensure that patients have been able to address their financial concerns and to assess the impact of  
8  
9 the service, we recommend implementing routine follow-up phone calls with patients at 3  
10  
11 months and 6 months after discharge. This may help ensure patients' action plans are fulfilled.  
12  
13 Clearly documenting the impact of the service may assist other team members to understand the  
14  
15 service's impact. Fourth, we recommend instituting a detailed checklist for the ISHP to ensure  
16  
17 each patient is made aware of all potential interventions, beyond their immediate goals. Fifth,  
18  
19 working with patients one-on-one to address their income security can be difficult for the ISHP  
20  
21 in the context of a social system that is unable to meet all needs. Despite the best efforts of such  
22  
23 a service it cannot solve issues like an inadequate supply of affordable housing or insufficient  
24  
25 social assistance rates. We recommend that the service incorporate dedicated time for system-  
26  
27 level advocacy in collaboration with others[25].  
28  
29  
30  
31  
32  
33  
34  
35

36 Remaining questions that could be explored by further implementation research include  
37  
38 examining the experience of patients with the service in both the short- and medium-term, using  
39  
40 qualitative methods. In addition, examining the views and experiences of physicians and other  
41  
42 members of the primary care team with the Income Security Health Promotion service would  
43  
44 shed light on how well the health promoters are integrated with the rest of the health care team  
45  
46 and whether there is a substantial link made between addressing biomedical issues and income  
47  
48 insecurity. It is highly likely that the effectiveness of the Income Security Health Promotion  
49  
50 service is related to the context in which it is operates. Future implementation research could  
51  
52 focus on organizational and community contextual factors that enable success or act as barriers.  
53  
54  
55  
56  
57  
58  
59  
60

*Income security health promotion to address poverty through primary care*

1  
2  
3 These could include the quality and frequency of communication between ISHP and the health  
4 care team, organizational support and alignment with mission and the existence and connection  
5 to community services that address income security. The effectiveness of the Income Security  
6 Health Promotion service could be examined through quantifying the impact on income security  
7 and health outcomes in the short-, medium- and long-term. A pragmatic randomized controlled  
8 trial is planned, after changes to the intervention are implemented.  
9  
10  
11  
12  
13  
14  
15  
16  
17  
18  
19

20 This study is an initial look at the new Income Security Health Promotion service at St.  
21 Michael's Hospital Family Health Team in Toronto, Canada. It is an important step on the  
22 pathway to understanding whether addressing low income in the clinical setting is good for  
23 health. Our findings may help define the utility of and future directions for, this type of novel  
24 income security service in primary care settings.  
25  
26  
27  
28  
29  
30  
31  
32  
33  
34  
35  
36  
37  
38  
39  
40  
41  
42  
43  
44  
45  
46  
47  
48  
49  
50  
51  
52  
53  
54  
55  
56  
57  
58  
59  
60

*Income security health promotion to address poverty through primary care***Acronyms**

1  
2  
3  
4  
5  
6  
7  
8  
9  
10  
11  
12  
13  
14  
15  
16  
17  
18  
19  
20  
21  
22  
23  
24  
25  
26  
27  
28  
29  
30  
31  
32  
33  
34  
35  
36  
37  
38  
39  
40  
41  
42  
43  
44  
45  
46  
47  
48  
49  
50  
51  
52  
53  
54  
55  
56  
57  
58  
59  
60

CPP: Canada Pension Plan

CRA: Canada Revenue Agency

EI: Employment insurance

EMR: Electronic medical record

GIS: Guaranteed Income Supplement

ISHP: Income security health promoter

OAS: Old Age Security

ODSP: Ontario Disability Support Program

OW: Ontario Works

FHT: St. Michael's Hospital Academic Family Health Team

WSIB: Workers Safety and Insurance Board

**Table 1.** Characteristics of patients referred to the Income Security Health Promotion service

| Patient characteristics                          |                          | Seen by the service (n=181) | Referred to the service but not seen (n=69) | P-value |
|--------------------------------------------------|--------------------------|-----------------------------|---------------------------------------------|---------|
|                                                  |                          | n (%) or mean (95% CI)      | n (%) or mean (95% CI)                      |         |
| Age                                              |                          | 47.6 (45.4-49.8)            | 45.8 (41.7-50.0)                            | 0.43    |
| Gender                                           | Female                   | 96 (53%)                    | 34 (49%)                                    | 0.77    |
|                                                  | Male                     | 78 (43%)                    | 33 (48%)                                    |         |
|                                                  | Transgender <sup>^</sup> | 7 (4%)                      | 2 (3%)                                      |         |
| Homeless                                         |                          | 13 (7%)                     | 7 (10%)                                     | 0.44    |
| Number of medical problems                       |                          | 4.7 (4.3-5.2)               | 5.0 (4.2-5.9)                               | 0.49    |
| Number of medications                            |                          | 6.4 (5.7-7.2)               | 6.1 (4.9-7.3)                               | 0.61    |
| Referral form present                            |                          | 119 (66%)                   | 58 (84%)                                    | <0.01   |
| <b>Information provided on the referral form</b> |                          | <b>(n=119)</b>              | <b>(n=58)</b>                               |         |
| Source of income*                                | Hourly wage              | 14 (12%)                    | 12 (21%)                                    | 0.11    |
|                                                  | Salary                   | 15 (13%)                    | 5 (9%)                                      | 0.43    |
|                                                  | Social assistance        | 55 (46%)                    | 28 (48%)                                    | 0.80    |
|                                                  | Pension                  | 9 (8%)                      | 4 (7%)                                      | 0.87    |

*Income security health promotion to address poverty through primary care*

|                             |                                                       |           |          |             |
|-----------------------------|-------------------------------------------------------|-----------|----------|-------------|
|                             | Workers compensation                                  | 1 (0.8%)  | 0 (0%)   | -           |
|                             | Employment insurance                                  | 9 (7%)    | 3 (5%)   | -           |
|                             | Other                                                 | 26 (22%)  | 15 (26%) | 0.55        |
| Patient needs help with...* | ...increasing income                                  | 102 (86%) | 52 (90%) | 0.46        |
|                             | ...reducing expenses                                  | 47 (40%)  | 29 (50%) | 0.19        |
|                             | ...financial literacy                                 | 36 (30%)  | 27 (47%) | <b>0.03</b> |
|                             | Interpreter required                                  | 4 (3%)    | 2 (3%)   | -           |
|                             | Literacy concerns                                     | 14 (12%)  | 7 (12%)  | 0.95        |
|                             | Connected to community resources                      | 26 (22%)  | 11 (19%) | 0.66        |
|                             | Spends a significant portion of income on medications | 10 (8%)   | 8 (14%)  | 0.27        |
|                             | Barriers to accessing health promotion service        | 24 (20%)  | 13 (22%) | 0.73        |
|                             | Urgent referral                                       | 31 (26%)  | 18 (31%) | 0.49        |

\*does not equal 100% because more than one option allowed; ^includes male-to-female and female-to male transgender patients; **bold-face** indicates significance at the 95% confidence level

**Table 2.** Details of patient encounters with the Income Security Health Promotion service

|                                                     | n (%) or<br>mean (95% CI)            |
|-----------------------------------------------------|--------------------------------------|
| Length of time for encounter (n=142)                | 66 min (61-71 min)                   |
| Type of encounter (n=181)                           |                                      |
| One-on-one in office                                | 130 (71%)                            |
| Phone assessment                                    | 79 (44%)                             |
| One-on-one in community                             | 6 (3%)                               |
| Liaising with community workers                     | 6 (3%)                               |
| Monthly income (\$ CAD) (n=164)                     | \$1,301.90 (\$912.95-<br>\$1,690.85) |
| Number of people supported (n=159)                  | 1.53 (1.35-1.71)                     |
| Monthly income per person (\$ CAD) (n=144)          | \$906.74 (\$744.16-<br>\$1,069.32)   |
| Inappropriate referral to health promoter           | 3 (2%)                               |
| <b>Main problems addressed in encounter (n=181)</b> |                                      |
| Increasing income*                                  |                                      |
| Any income problem                                  | 140 (77%)                            |
| Ontario Works (OW- welfare)                         | 49 (27%)                             |
| Ontario Disability Support Program<br>(ODSP)        | 65 (36%)                             |
| Employment Insurance (EI)/EI sick<br>benefits       | 21 (12%)                             |
| Workers Safety Insurance Board                      | 3 (2%)                               |

*Income security health promotion to address poverty through primary care*

|                     |                                                           |           |
|---------------------|-----------------------------------------------------------|-----------|
|                     | Canada Pension Plan (CPP)/CPP disability                  | 25 (14%)  |
|                     | Old Age Security (OAS)/Guaranteed Income Supplement (GIS) | 10 (5%)   |
|                     | Child care benefits                                       | 6 (3%)    |
|                     | Loans                                                     | 2 (1%)    |
|                     | Gaining employment                                        | 15 (8%)   |
|                     | Education/completion education                            | 8 (4%)    |
|                     | Training or re-training                                   | 17 (9%)   |
|                     | Filing taxes                                              | 50 (28%)  |
|                     | Disability tax credit                                     | 4 (2%)    |
| Reducing expenses*  | Any expense problem                                       | 106 (59%) |
|                     | Housing                                                   | 49 (27%)  |
|                     | Medications or medical supplies                           | 21 (12%)  |
|                     | Transportation                                            | 17 (9%)   |
|                     | Food                                                      | 28 (15%)  |
|                     | Clothing                                                  | 10 (5%)   |
|                     | Furniture & household supplies                            | 7 (4%)    |
|                     | Child care                                                | 8 (4%)    |
|                     | Other goods/services                                      | 30 (17%)  |
| Financial literacy* | Any financial literacy problem                            | 48 (26%)  |
|                     | Banking                                                   | 12 (7%)   |
|                     | Saving and retirement planning                            | 11 (6%)   |

*Income security health promotion to address poverty through primary care*

1  
2  
3  
4  
5  
6  
7  
8  
9  
10  
11  
12  
13  
14  
15  
16  
17  
18  
19  
20  
21  
22  
23  
24  
25  
26  
27  
28  
29  
30  
31  
32  
33  
34  
35  
36  
37  
38  
39  
40  
41  
42  
43  
44  
45  
46  
47  
48  
49  
50  
51  
52  
53  
54  
55  
56  
57  
58  
59  
60

|                                   |          |
|-----------------------------------|----------|
| Budgeting                         | 26 (14%) |
| Referral for credit counselling   | 9 (5%)   |
| Avoiding fraud                    | 7 (4%)   |
| Bankruptcy                        | 11 (6%)  |
| Debt restructuring and management | 11 (6%)  |

\*does not sum to 100% as more than one option could be selected

For peer review only



*Income security health promotion to address poverty through primary care***Table 3.** Action plans developed by the Income Security Health Promotion service

| Action Plan Details (n=181)                                                                                                                                                                                                                                                                                                                                                                                                                                                           | n (%)                                                                                                             |
|---------------------------------------------------------------------------------------------------------------------------------------------------------------------------------------------------------------------------------------------------------------------------------------------------------------------------------------------------------------------------------------------------------------------------------------------------------------------------------------|-------------------------------------------------------------------------------------------------------------------|
| Action plan for ISHP* <ul style="list-style-type: none"> <li>Any actions required by health promoter</li> <li>Provide patient with resources/handouts</li> <li>Consult with external organization</li> <li>Gather additional information</li> <li>Advocate for patient to external organization</li> <li>Plan for accompanying patient</li> <li>Form completion/review/assistance</li> <li>Refer internally to family health team</li> <li>Refer externally</li> <li>Other</li> </ul> | 143 (79%)<br>69 (38%)<br>60 (33%)<br>45 (25%)<br>48 (26%)<br>6 (3%)<br>47 (26%)<br>16 (9%)<br>33 (18%)<br>14 (8%) |
| Action plan for patient* <ul style="list-style-type: none"> <li>Any action for patient</li> <li>Gather supporting documents</li> <li>Contact external organization</li> <li>Review materials provided</li> <li>Other</li> </ul>                                                                                                                                                                                                                                                       | 119 (66%)<br>58 (32%)<br>57 (31%)<br>19 (10%)<br>38 (21%)                                                         |
| Plan for follow-up                                                                                                                                                                                                                                                                                                                                                                                                                                                                    | 105 (58%)                                                                                                         |
| Discharged                                                                                                                                                                                                                                                                                                                                                                                                                                                                            | 34 (19%)                                                                                                          |

\*does not sum to 100% as more than one option could be selected

**Competing interests statement**

All authors have completed the ICMJE uniform disclosure form at [www.icmje.org/coi\\_disclosure.pdf](http://www.icmje.org/coi_disclosure.pdf) and declare: no support from any organisation for the submitted work; no financial relationships with any organisations that might have an interest in the submitted work in the previous three years; no other relationships or activities that could appear to have influenced the submitted work

**Ethics approval**

This study has been approved by the St. Michael's Hospital Research Ethics Board (14-415).

**Contributorship statement**

Marcella K. Jones assisted with the design of the study, collected the data, analyzed it and helped with drafting and editing the manuscript. Gary Bloch assisted with the design of the study and preparation of the manuscript. Andrew D. Pinto led the design of the study, assisted with the collection and analysis of data and helped with drafting and editing the manuscript.

**Data sharing statement**

No additional data are available.

## References

- 1 World Health Organization. Commission on Social Determinants of Health. Geneva: 2008.
- 2 Adler N, Ostrove J. Socioeconomic status and health : what we know and what we don ' t . PubMed Commons. *Ann N Y Acad Sci* 1999;**896**:3–15. doi:10.1111/j.1749-6632.1999.tb08101.x
- 3 Public Health Agency of Canada. What Makes Canadians Healthy or Unhealthy? Population Health Approach Public Health Agency of Canada. 2013.<http://www.phac-aspc.gc.ca/ph-sp/determinants/determinants-eng.php#education>
- 4 Public Health Agency of Canada (PHAC). *The Chief Public Health Officer's Report on The State of Public Health in Canada 2008*. 2008. <http://www.phac-aspc.gc.ca/cphorsphc-respcacsp/2008/fr-rc/cphorsphc-respcacsp05a-eng.php>
- 5 Marmot MG, Shipley MJ. Do socioeconomic differences in mortality persist after retirement? 25 year follow up of civil servants from the first Whitehall study. *BMJ* 1996;**313**:1177–80. doi:10.1136/bmj.313.7066.1177
- 6 Marmot M, Wilkinson RG. Psychosocial and material pathways in the relation between income and health: a response to Lynch et al. *BMJ* 2001;**322**:1233–6. doi:10.1136/bmj.322.7296.1233
- 7 Marmot M. Why should the rich care about the health of the poor? *Cmaj* 2012;**184**:1231–2. doi:10.1503/cmaj.121088
- 8 Wilkinson R, Marmot M. Social Determinants of Health: the Solid Facts. *World Heal Organ* 2003;**2**:1–33. doi:10.1016/j.jana.2012.03.001
- 9 Fitzpatrick T, Rosella LC, Calzavara A, *et al*. Looking Beyond Income and Education. *Am*

*Income security health promotion to address poverty through primary care*

- 1  
2  
3  
4  
5  
6  
7  
8  
9  
10  
11  
12  
13  
14  
15  
16  
17  
18  
19  
20  
21  
22  
23  
24  
25  
26  
27  
28  
29  
30  
31  
32  
33  
34  
35  
36  
37  
38  
39  
40  
41  
42  
43  
44  
45  
46  
47  
48  
49  
50  
51  
52  
53  
54  
55  
56  
57  
58  
59  
60
- J Prev Med* 2015;;1–11. doi:10.1016/j.amepre.2015.02.018
- 10 Rosella LC, Fitzpatrick T, Wodchis WP, *et al.* High-cost health care users in Ontario, Canada: demographic, socio-economic, and health status characteristics. *BMC Health Serv Res* 2014;**14**:532. doi:10.1186/s12913-014-0532-2
- 11 Organization; IL. Income security index. <http://www.ilo.org/sesame/SESHELP.NoteISI> (accessed 3 Jun 2017).
- 12 Organization IL. Economic security for a better world. Geneva: 2004.
- 13 Manzano AT, Raphael D. CPHA and the social determinants of health: An analysis of policy documents and statements and recommendations for future action. *Can J Public Heal* 2010;**101**:399–404.
- 14 Bloch G, Etches V, Gardner C, *et al.* Why poverty makes us sick: a physician backgrounder. *Ont Med Rev* 2008;;32–7.
- 15 Bloch G, Etches V, Gardner C, *et al.* Identifying poverty in your practice and community. *Ont Med Rev* 2008;;39–43.
- 16 Bloch G, Etches V, Gardner C, *et al.* Strategies for physicians to mitigate the health effects of poverty. *Ont Med Rev* 2008;;45–9.
- 17 Physicians and health equity: opportunities in practice. 2013.
- 18 The College of Family Physicians of Canada. Best Advice: Social Determinants of Health. Published Online First: 2015.<http://patientsmedicalhome.ca/resources/best-advice-guide-social-determinants-health/>
- 19 Kiran T, Pinto AD. Swimming ‘ upstream ’ to tackle the social determinants of health. *BMJ Qual Saf* 2016;**25**:138–140. doi:10.1136/bmjqs-2015-005008
- 20 Paris JA, Player D. Citizens’ advice in general practice. *Bmj* 1993;**306**:1518–20.

*Income security health promotion to address poverty through primary care*

- 1  
2  
3  
4  
5  
6  
7  
8  
9  
10  
11  
12  
13  
14  
15  
16  
17  
18  
19  
20  
21  
22  
23  
24  
25  
26  
27  
28  
29  
30  
31  
32  
33  
34  
35  
36  
37  
38  
39  
40  
41  
42  
43  
44  
45  
46  
47  
48  
49  
50  
51  
52  
53  
54  
55  
56  
57  
58  
59  
60
- doi:10.1136/bmj.307.6902.504-a
- 21 Abbott S, Hobby L, Cotter S. What is the impact on individual health of services in general practice settings which offer welfare benefits advice? *Heal Soc Care Community* 2006;**14**:1–8. doi:10.1111/j.1365-2524.2005.00582.x
- 22 Adams J, White M, Moffatt S, *et al.* A systematic review of the health, social and financial impacts of welfare rights advice delivered in healthcare settings. *BMC Public Health* 2006;**6**:81. doi:10.1186/1471-2458-6-81
- 23 Mackintosh J, White M, Howel D, *et al.* Randomised controlled trial of welfare rights advice accessed via primary health care: pilot study [ISRCTN61522618]. *BMC Public Health* 2006;**6**:162. doi:10.1186/1471-2458-6-162
- 24 Brownell MD, Chartier MJ, Nickel NC, *et al.* Unconditional Prenatal Income Supplement and Birth Outcomes. *Pediatrics* 2016;**137**:e20152992–e20152992. doi:10.1542/peds.2015-2992
- 25 Abbott S. Prescribing welfare benefits advice in primary care: Is it a health intervention, and if so, what sort? *J Public Health Med* 2002;**24**:307–12. doi:10.1093/pubmed/24.4.307
- 26 Allmark P, Baxter S, Goyder E, *et al.* Assessing the health benefits of advice services: Using research evidence and logic model methods to explore complex pathways. *Heal Soc Care Community* 2013;**21**:59–68. doi:10.1111/j.1365-2524.2012.01087.x
- 27 Shartal S, Cowan L, Khandor E, *et al.* Failing the Homeless: Barriers in the Ontario Disability Support Program for Homeless People with Disabilities. Toronto: 2006.
- 28 Starfield BMDMPH. Toward international primary care reform. *Can Med Assoc J* 2009;**180**:1091–2. doi:10.1503/cmaj.090542
- 29 Starfield B. Primary care and equity in health: the importance to effectiveness and equity

*Income security health promotion to address poverty through primary care*

- 1  
2  
3 of responsiveness to peoples' needs. *Humanity Soc* 2009;**33**:56–73.  
4  
5  
6 30 Shadmi E, Wong WC, Kinder K, *et al.* Primary care priorities in addressing health equity:  
7  
8 summary of the WONCA 2013 health equity workshop. *Int J Equity Health* 2014;**13**:104.  
9  
10 doi:10.1186/s12939-014-0104-4  
11  
12  
13 31 Maeseneer J, Willems S, De Sutter A, *et al.* Primary health care as a strategy for achieving  
14  
15 equitable care: a literature review commissioned by the Health Systems Knowledge  
16  
17 Network. 2007.  
18  
19 www.who.int/social\_determinants/resources/csdh\_media/primary\_health\_care\_2007\_en.p  
20  
21 df  
22  
23  
24 32 Loignon C, Hudon C, Goulet É, *et al.* Perceived barriers to healthcare for persons living in  
25  
26 poverty in Quebec, Canada: the EQUIhealThY project. *Int J Equity Health* 2015;**14**:4.  
27  
28 doi:10.1186/s12939-015-0135-5  
29  
30  
31 33 Bloch G, Rozmovits L, Giambrone B. Barriers to primary care responsiveness to poverty  
32  
33 as a risk factor for health. *BMC Fam Pract* 2011;**12**:62. doi:10.1186/1471-2296-12-62  
34  
35  
36 34 Tatsioni A, Lionis C. Responding to financial and economic crisis: What methodology  
37  
38 and interventions we need in family practice research. *Fam Pract* 2016;**33**:1–3.  
39  
40 doi:10.1093/fampra/cm105  
41  
42  
43 35 Loignon C, Fortin M, Bedos C, *et al.* Providing care to vulnerable populations: A  
44  
45 qualitative study among GPs working in deprived areas in Montreal, Canada. *Fam Pract*  
46  
47 2015;**32**:232–6. doi:10.1093/fampra/cmu094  
48  
49  
50 36 Ruano AL, Furler J, Shi L. Interventions in Primary Care and their Contributions to  
51  
52 Improving Equity in Health. *Int J Equity Health* 2015;**14**:153. doi:10.1186/s12939-015-  
53  
54 0284-6  
55  
56  
57  
58  
59  
60

*Income security health promotion to address poverty through primary care*

- 1  
2  
3  
4 37 Glazier RH, Kopp A, Schultz SE, *et al.* All the Right Intentions but Few of the Desired  
5 Results: Lessons on Access to Primary Care from Ontario's Patient Enrolment Models.  
6  
7  
8 *Healthc Q* 2012;**15**:17–21.  
9
- 10 38 Murphy K, Glazier R, Wang X, Holton E, Fazli G HM. Hospital Care For All: An Equity  
11 Report on Differences in Household Income Among Patients at Toronto Central Local  
12 Health Integration Network (TC LHIN) Hospitals, 2008-2010. 2012.  
13  
14 <https://www.ices.on.ca/Publications/Atlases-and-Reports/2012/Hospital-Care-For-All>  
15  
16 (accessed 31 May 2017).  
17  
18  
19  
20  
21
- 22 39 St. Michael's Hospital. St. Michael's Hospital Strategic Plan 2015-18: World Leadership  
23 in Urban Health. Toronto: 2015.  
24  
25  
26
- 27 40 Poverty HPA. Health Providers Against Poverty. <https://healthprovidersagainstpoverty.ca/>  
28  
29 (accessed 2 Jun 2017).  
30  
31
- 32 41 Ontario College of Family Physicians. Primary care interventions in poverty.  
33 2016.<http://ocfp.on.ca/cpd/povertytool> (accessed 7 Nov 2016).  
34  
35
- 36 42 Brcic V, Eberdt C, Kaczorowski J. Development of a tool to identify poverty in a family  
37 practice setting: a pilot study. *Int. J. Family Med.* 2011;**1**–7. doi:10.1155/2011/812182  
38  
39  
40
- 41 43 Brcic V, Eberdt C, Kaczorowski J. Corrigendum to 'Development of a tool to identify  
42 poverty in a family practice setting: a pilot study'. *Int J Family Med* 2015.  
43  
44  
45
- 46 44 Best advice - Social determinants of health. 2015.  
47
- 48 45 Abbott S, Hobby L. Welfare bene ® ts advice in primary care : evidence of improvements  
49 in health. *Public Health* 2000;**324**–7.  
50  
51  
52
- 53 46 Moffatt S, Mackintosh J. Older people's experience of proactive welfare rights advice:  
54 qualitative study of a South Asian community. *Ethn Health* 2009;**14**:5–25.  
55  
56  
57  
58  
59  
60

*Income security health promotion to address poverty through primary care*

- 1  
2  
3  
4  
5  
6  
7  
8  
9  
10  
11  
12  
13  
14  
15  
16  
17  
18  
19  
20  
21  
22  
23  
24  
25  
26  
27  
28  
29  
30  
31  
32  
33  
34  
35  
36  
37  
38  
39  
40  
41  
42  
43  
44  
45  
46  
47  
48  
49  
50  
51  
52  
53  
54  
55  
56  
57  
58  
59  
60
- doi:10.1080/13557850802056455
- 47 Greasley P, Small N. Providing welfare advice in general practice: Referrals, issues and outcomes. *Heal Soc Care Community* 2005;**13**:249–58. doi:10.1111/j.1365-2524.2005.00557.x
- 48 Levy J, Payne M. Welfare rights advocacy in a specialist health and social care setting: A service audit. *Br J Soc Work* 2006;**36**:323–31. doi:10.1093/bjsw/bch366
- 49 Moffatt S, Noble E, White M. Addressing the financial consequences of cancer: Qualitative evaluation of a welfare rights advice service. *PLoS One* 2012;**7**. doi:10.1371/journal.pone.0042979
- 50 Browne AJ, Varcoe CM, Wong ST, *et al*. Closing the health equity gap: evidence-based strategies for primary health care organizations. *Int J Equity Health* 2012;**11**:59. doi:10.1186/1475-9276-11-59
- 51 Ministry of Community and Social Services, Government of Ontario. The role of refundable tax credits. Toronto: 2013.



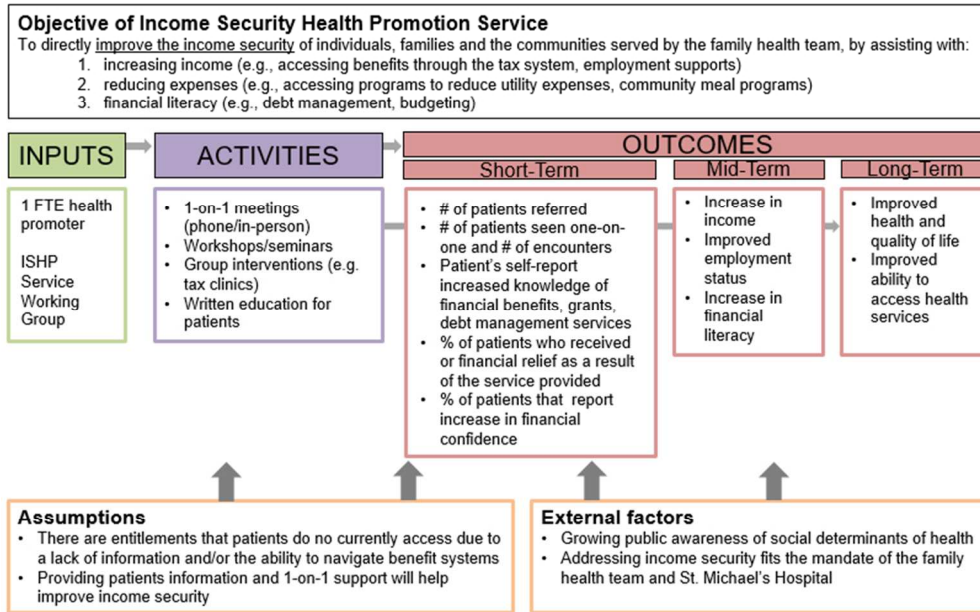

Abbreviated program logic model for the Income Security Health Promotion Service.

review only
